# Supplementary material for: Preparation and properties of thermostable well-functionalized graphene oxide/polyimide composite films with high dielectric constant, low dielectric loss and high strength via in situ polymerization
Source: Royal Society of Chemistry journal article supplement (doi:10.1039/c5ta00943j), 2015-01-01
Supplement: c5ta00943j1.pdf [file c5ta00943j1.pdf]

## Electronic Supplementary Information (ESI)

### Experimental details

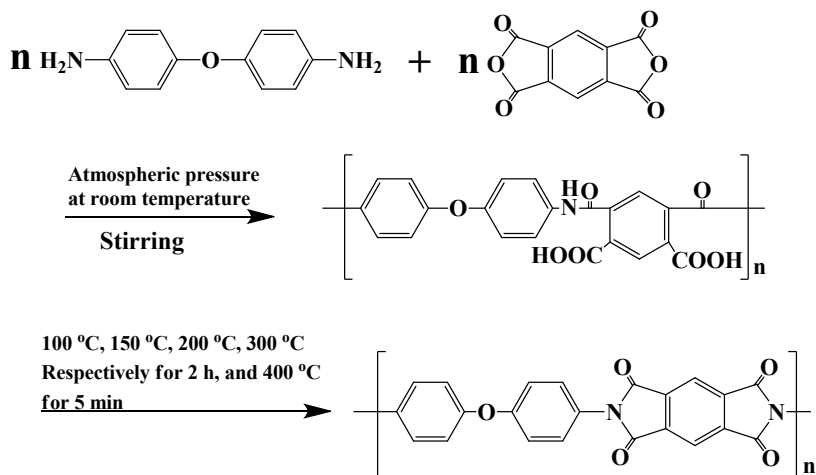

Scheme S1 Synthesis of PI

### Preparation of GO

GO was prepared according to the Hummers method by reacting graphite (2g) and  $\text{NaNO}_3$  (1g) with conc.  $\text{H}_2\text{SO}_4$  (46mL). This mixture was stirred in an ice-water bath, and 6g of  $\text{KMnO}_4$  was slowly added while stirring, and the rate of addition was carefully controlled to prevent the mixture temperature from exceeding 20°C. The mixture continued to be stirred for 2h in an ice-water bath for further development of oxidation. Then the mixture was transferred to a 35 °C oil bath and stirred for 0.5 h, forming a thick paste. Subsequently, 100mL de-ionized water was added gradually. Immediately, temperature was raised to 98 °C. After another 15min, the mixture was added to 300 mL de-ionized water and 20 mL 30%  $\text{H}_2\text{O}_2$ . The mixed solution was then filtered and washed with 5% HCl and de-ionized to neutral. The product was dried at 60°C under vacuum, producing 3.2 g GO.
